# Supplementary material
Source: PubMed Central journal article supplement (PMC1913848)

Step size  $s$  (nm)

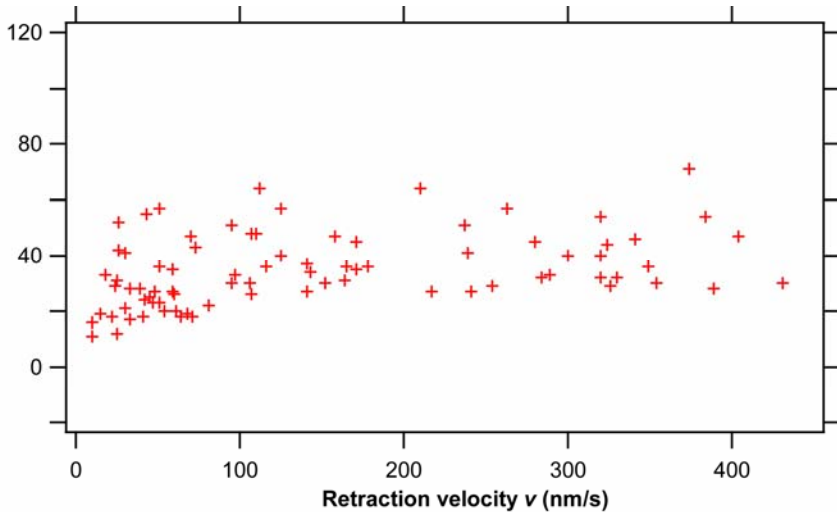

Supplement: pnas_0702449104_1.pdf [file pnas_0702449104_1.pdf]
